# Supplementary material
Source: PubMed Central journal article supplement (PMC5380229)
Supplement: NIHMS854650-supplement-Online_Supplement.pdf [file NIHMS854650-supplement-Online_Supplement.pdf]

# Confirmation of *TTN*, *MYL2* and *ALPK3* variants by Sanger sequencing

***TTN*:c.39909A>C (p.Lys22368Asn)**

81 reads, 37A, 44C

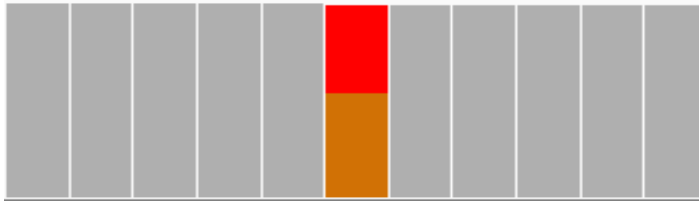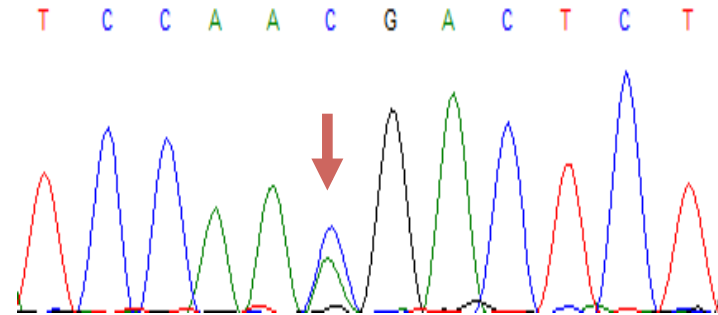

***MYL2*:c.37G>A (p.Ala13Thr)**

74 reads, 41G, 33A

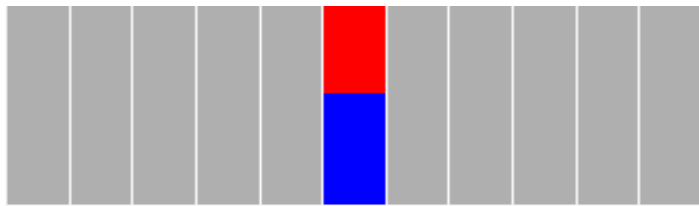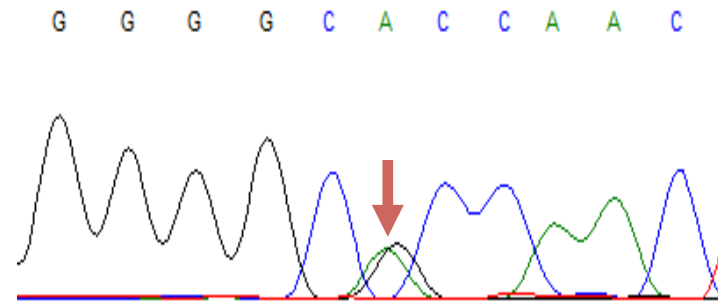

***ALPK3*:c.242C>T (p.Thr81Met)**

83 reads, 41C, 42T

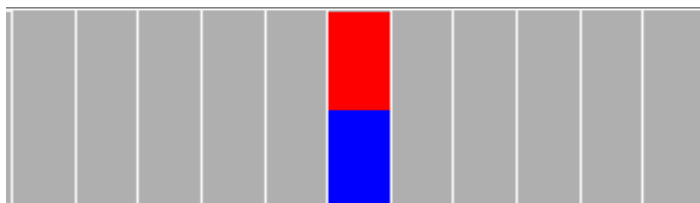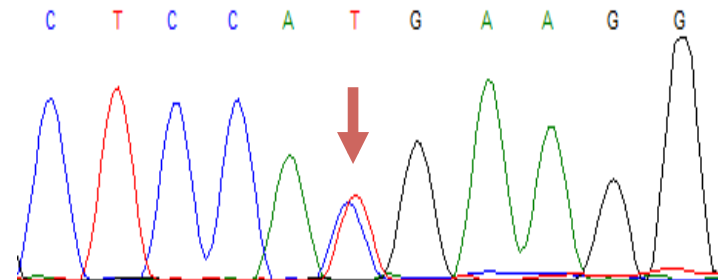

Online Table I

| GENE    | II-2   |         |        | III-1 |       |       | III-4  |       |       | Average |       |       |
|---------|--------|---------|--------|-------|-------|-------|--------|-------|-------|---------|-------|-------|
|         | 1X     | 10X     | 20X    | 1X    | 10X   | 20X   | 1X     | 10X   | 20X   | 1X      | 10X   | 20X   |
| MYH7    | 100.0  | 95.9    | 88.7   | 100.0 | 97.3  | 91.8  | 99.5   | 95.8  | 88.6  | 99.8    | 96.3  | 89.7  |
| MYBPC3  | 100.0  | 99.2    | 96.2   | 100.0 | 100.0 | 96.6  | 100.0  | 99.4  | 96.6  | 100.0   | 99.5  | 96.5  |
| TNNT2   | 100.0  | 99.9    | 96.5   | 100.0 | 100.0 | 100.0 | 100.0  | 98.5  | 95.3  | 100.0   | 99.5  | 97.3  |
| TNNI3   | 100.0  | 100.0   | 95.5   | 100.0 | 100.0 | 94.5  | 100.0  | 100.0 | 90.5  | 100.0   | 100.0 | 93.5  |
| TPM1    | 100.0  | 100.0   | 100.0  | 100.0 | 100.0 | 99.9  | 100.0  | 100.0 | 98.4  | 100.0   | 100.0 | 99.4  |
| ACTC1   | 100.0  | 98.2    | 91.1   | 100.0 | 98.3  | 93.5  | 100.0  | 100.0 | 92.1  | 100.0   | 98.8  | 92.2  |
| MYL2    | 100.0  | 100.0   | 100.0  | 100.0 | 100.0 | 100.0 | 100.0  | 100.0 | 100.0 | 100.0   | 100.0 | 100.0 |
| MYL3    | 100.0  | 100.0   | 100.0  | 100.0 | 100.0 | 100.0 | 100.0  | 100.0 | 100.0 | 100.0   | 100.0 | 100.0 |
| TTN     | 98.5   | 97.6    | 96.5   | 98.8  | 97.9  | 96.9  | 98.8   | 97.9  | 96.8  | 98.7    | 97.8  | 96.7  |
| ALPK3   | 100.0  | 95.4    | 92.4   | 100.0 | 96.5  | 94.0  | 100.0  | 95.5  | 93.2  | 100.0   | 95.8  | 93.2  |
| FHL1    | 100.0  | 98.5    | 91.0   | 100.0 | 91.5  | 80.0  | 100.0  | 100.0 | 95.6  | 100.0   | 96.7  | 88.9  |
| PLN     | 100.0  | 100.0   | 88.6   | 100.0 | 99.0  | 92.9  | 100.0  | 100.0 | 98.0  | 100.0   | 99.7  | 93.2  |
| GLA     | 100.0  | 100.0   | 100.0  | 100.0 | 100.0 | 100.0 | 100.0  | 100.0 | 100.0 | 100.0   | 100.0 | 100.0 |
| LAMP2   | 100.0  | 99.7    | 91.9   | 100.0 | 93.0  | 83.6  | 100.0  | 98.6  | 96.1  | 100.0   | 97.1  | 90.5  |
| PRKAG2  | 100.0  | 97.7    | 97.7   | 100.0 | 99.9  | 97.7  | 100.0  | 98.3  | 97.7  | 100.0   | 98.7  | 97.7  |
| NEXN    | 100.0  | 100.0   | 97.7   | 100.0 | 100.0 | 99.7  | 100.0  | 100.0 | 97.1  | 100.0   | 100.0 | 98.2  |
| Average | 99.9   | 98.9    | 95.2   | 99.9  | 98.3  | 95.1  | 99.9   | 99.0  | 96.0  |         |       |       |
| SD      | 0.3775 | 1.53495 | 4.0687 | 0.293 | 2.655 | 5.96  | 0.3048 | 1.508 | 3.382 |         |       |       |

Online Table II

| Gene            | Protein Change                        | Mutation Type         | EXAC Non-Finnish European | GTEx (100XFPK) $M_{1/2}$ |
|-----------------|---------------------------------------|-----------------------|---------------------------|--------------------------|
| <i>ADAM28</i>   | p.Tyr107Asn                           | Nonsynonymous         | 0.009% $\pm$ 0.01%        | 4.00                     |
| <i>ADRB1</i>    | p.Asp382Gly                           | Nonsynonymous         | 0.078% $\pm$ 0.025%       | 32.00                    |
| <i>ALPK3</i>    | p.Thr81Met                            | Nonsynonymous         | 0.148% $\pm$ 0.053%       | 54.00                    |
| <i>ALS2CR12</i> | p.Gln168Glu                           | Deletion (frameshift) | 0.03% $\pm$ 0.016%        | 10.00                    |
| <i>ANK3</i>     | c.1690-4delT                          | Splice region         |                           | 25.00                    |
| <i>ANKRD11</i>  | p.Ala618Thr                           | Nonsynonymous         | 0.071% $\pm$ 0.023%       | 26.00                    |
| <i>ANKRD13C</i> | p.Gly138Val                           | Cryptic splicing      | 0.215% $\pm$ 0.044%       | 17.00                    |
| <i>ANO9</i>     | p.ArgGlnAla49GlnGlnVal                | Cryptic splicing      |                           | 5.00                     |
| <i>ARG1</i>     | p.Gly169Ala                           | Nonsynonymous         | 0.016% $\pm$ 0.013%       | 5.00                     |
| <i>ARSB</i>     | p.Asn458Ser                           | Nonsynonymous         | 0.11% $\pm$ 0.028%        | 14.00                    |
| <i>ASXL3</i>    | p.Leu2067Arg                          | Nonsynonymous         | 0.966% $\pm$ 0.077%       | 6.00                     |
| <i>ATXN1</i>    | p.Ile730Val                           | Cryptic splicing      | 0.03% $\pm$ 0.016%        | 15.00                    |
| <i>BCOR</i>     | p.Ala161Val                           | Nonsynonymous         | 0.114% $\pm$ 0.028%       | 21.00                    |
| <i>BRCA1</i>    | c.2077_2082delGACAGCins GACAGT(p.%3D) | Cryptic splicing      |                           | 10.00                    |
| <i>BRICD5</i>   | p.Thr69Ile                            | Nonsynonymous         | 0.259% $\pm$ 0.11%        | 22.00                    |
| <i>C1orf106</i> | p.Arg469Cys                           | Cryptic splicing      | 0.253% $\pm$ 0.068%       | 1.00                     |
| <i>C9orf47</i>  | p.Arg66Gly                            | Nonsynonymous         | 0.026% $\pm$ 0.028%       | 4.00                     |
| <i>CCDC180</i>  | p.Ile1679Val                          | Cryptic splicing      | 0.049% $\pm$ 0.02%        | 9.00                     |
| <i>CDC14A</i>   | p.Val260Met                           | Nonsynonymous         | 0.303% $\pm$ 0.044%       | 10.00                    |
| <i>CDH4</i>     | p.Arg677His                           | Nonsynonymous         | 0.044% $\pm$ 0.019%       | 2.00                     |
| <i>CEP131</i>   | p.Ser642Gly                           | Nonsynonymous         | 0.231% $\pm$ 0.04%        | 17.00                    |
| <i>CEP131</i>   | p.His238Arg                           | Nonsynonymous         | 0.21% $\pm$ 0.037%        | 17.00                    |
| <i>CEP250</i>   | p.His2129Arg                          | Nonsynonymous         | 0.256% $\pm$ 0.041%       | 14.00                    |
| <i>CFAP43</i>   | p.Val197Met                           | Nonsynonymous         | 0.576% $\pm$ 0.061%       | 2.00                     |
| <i>CFHR1</i>    | c.435T>G(p.%3D)                       | Cryptic splicing      | 0.137% $\pm$ 0.033%       | 13.00                    |
| <i>CLDN23</i>   | p.Ala90Thr                            | Nonsynonymous         | 0.609% $\pm$ 0.069%       | 6.00                     |
| <i>CLTCL1</i>   | p.Gly169Asp                           | Nonsynonymous         | 0.021% $\pm$ 0.015%       | 19.00                    |
| <i>CLUAP1</i>   | p.Ala107Val                           | Nonsynonymous         |                           | 13.00                    |
| <i>COL17A1</i>  | p.Val991Met                           | Nonsynonymous         | 0.152% $\pm$ 0.032%       | 3.00                     |
| <i>COL24A1</i>  | p.Asp844Ala                           | Nonsynonymous         | 0.004% $\pm$ 0.009%       | 7.00                     |
| <i>COL4A2</i>   | p.Pro650Ser                           | Nonsynonymous         | 0.209% $\pm$ 0.038%       | 66.00                    |
| <i>COL6A5</i>   | p.Tyr2438Ser                          | Nonsynonymous         | 0.264% $\pm$ 0.041%       | 0.43                     |
| <i>COL6A5</i>   | p.Glu2272Ter                          | Stopgain              | 1.15% $\pm$ 0.098%        | 0.43                     |
| <i>COPB1</i>    | c.813C>G(p.%3D)                       | Cryptic splicing      | 0.099% $\pm$ 0.027%       | 38.00                    |
| <i>CPTP</i>     | c.504C>T(p.%3D)                       | Cryptic splicing      | 0.045% $\pm$ 0.02%        | 48.00                    |
| <i>CRYBB1</i>   | p.Arg110Cys                           | Nonsynonymous         | 0.365% $\pm$ 0.049%       | 4.00                     |
| <i>CRYBG3</i>   | p.Lys978Gln                           | Nonsynonymous         | 0.049% $\pm$ 0.13%        | 21.00                    |
| <i>DAP</i>      | p.Arg65Gln                            | Nonsynonymous         | 0.264% $\pm$ 0.042%       | 45.00                    |
| <i>DDX20</i>    | c.1210+3delA                          | Splice region         |                           | 14.00                    |
| <i>DDX25</i>    | p.Tyr113Cys                           | Cryptic splicing      | 0.01% $\pm$ 0.014%        | 4.00                     |
| <i>DENND2A</i>  | p.Arg542Gln                           | Nonsynonymous         | 0.052% $\pm$ 0.022%       | 20.00                    |
| <i>DENND4C</i>  | c.*153C>T                             | Cryptic splicing      |                           | 21.00                    |
| <i>DMRTA1</i>   | p.Ser279Cys                           | Nonsynonymous         | 0.053% $\pm$ 0.021%       | 5.00                     |

|                 |                         |                              |                 |        |
|-----------------|-------------------------|------------------------------|-----------------|--------|
| <i>DNTT</i>     | p.Pro140Leu             | Nonsynonymous                | 0.086% ± 0.025% | 0.46   |
| <i>DPP6</i>     | p.Leu252Cys             | Nonsynonymous                |                 | 2.00   |
| <i>EPB41L5</i>  | p.Arg28Cys              | Nonsynonymous                | 0.492% ± 0.055% | 14.00  |
| <i>ERVV-2</i>   | c.*151_*152insGG        | Cryptic splicing             |                 | 0.06   |
| <i>FAM162A</i>  | c.263+1G>A              | Splicing                     | 0.094% ± 0.026% | 63.00  |
| <i>FANCM</i>    | p.Leu57Phe              | Nonsynonymous                | 0.252% ± 0.04%  | 7.00   |
| <i>FRMPD1</i>   | c.738+3A>G              | Splice region                | 0.273% ± 0.043% | 4.00   |
| <i>FUCA2</i>    | p.Leu20_Leu21dup        | Insertion<br>(nonframeshift) |                 | 37.00  |
| <i>GCGR</i>     | c.660G>A(p.%3D)         | Splice region                | 0.152% ± 0.119% | 0.99   |
| <i>GCNT1</i>    | p.Pro368Leu             | Nonsynonymous                | 0.918% ± 0.074% | 7.00   |
| <i>GCSAML</i>   | p.Asn73His              | Nonsynonymous                | 0.665% ± 0.064% | 2.00   |
| <i>GDI2</i>     | c.45+1253delT           | Splice region                |                 | 49.00  |
| <i>HES3</i>     | p.Gly108Arg             | Nonsynonymous                | 0.152% ± 0.293% | 0.10   |
| <i>HMCN1</i>    | p.Thr1232Met            | Nonsynonymous                | 0.698% ± 0.065% | 11.00  |
| <i>IGHV3-53</i> | p.Ile31Val              | Cryptic splicing             |                 | 1.00   |
| <i>IGSF9</i>    | p.Arg195Gln             | Nonsynonymous                | 0.08% ± 0.024%  | 6.00   |
| <i>IL2RG</i>    | p.Glu109Lys             | Nonsynonymous                | 0.109% ± 0.028% | 10.00  |
| <i>IPMK</i>     | p.Thr28Ala              | Nonsynonymous                | 0.071% ± 0.026% | 9.00   |
| <i>KBTBD13</i>  | p.Gly265Asp             | Cryptic splicing             |                 | 13.00  |
| <i>KCNK15</i>   | p.Thr260Pro             | Nonsynonymous                |                 | 10.00  |
| <i>KLF14</i>    | p.His47Pro              | Nonsynonymous                |                 | 2.00   |
| <i>LAMTOR5</i>  | p.Pro45Leu              | Nonsynonymous                | 0.068% ± 0.023% | 65.00  |
| <i>LAP3</i>     | p.Asn271Ser             | Cryptic splicing             | 0.053% ± 0.021% | 40.00  |
| <i>LRIG2</i>    | p.Thr765Ile             | Nonsynonymous                | 0.129% ± 0.03%  | 13.00  |
| <i>LRRC3</i>    | c.*1C>T                 | Cryptic splicing             | 0.283% ± 0.046% | 9.00   |
| <i>LRRC37B</i>  | p.Thr183Ile             | Nonsynonymous                | 0.25% ± 0.04%   | 9.00   |
| <i>MAOA</i>     | p.Lys520Arg             | Nonsynonymous                | 0.072% ± 0.024% | 52.00  |
| <i>MC1R</i>     | p.Tyr152Ter             | Stopgain                     | 0.108% ± 0.028% | 10.00  |
| <i>MDH2</i>     | p.Lys328Gln             | Nonsynonymous                | 0.342% ± 0.047% | 110.00 |
| <i>MIB2</i>     | p.Gln646Arg             | Nonsynonymous                | 0.216% ± 0.044% | 35.00  |
| <i>MIEF1</i>    | p.Gly90Asp              | Nonsynonymous                | 0.022% ± 0.015% | 20.00  |
| <i>MIR4477B</i> |                         | Cryptic splicing             |                 | 2.00   |
| <i>MUC12</i>    | p.Val20Leu              | Nonsynonymous                |                 | 1.00   |
| <i>NEB</i>      | c.20467-4dupT           | Splice region                |                 | 14.00  |
| <i>NECAB3</i>   | p.Arg203Gln             | Nonsynonymous                | 0.034% ± 0.09%  | 42.00  |
| <i>NIPAL2</i>   | c.*344C>G               | Cryptic splicing             |                 | 20.00  |
| <i>NOTCH2</i>   | p.Arg1786Gln            | Nonsynonymous                | 0.003% ± 0.008% | 21.00  |
| <i>NUDT16</i>   | p.Ala4Ser               | Nonsynonymous                | 0.815% ± 0.211% | 34.00  |
| <i>OR1J4</i>    | p.Glu4Lys               | Nonsynonymous                | 0.002% ± 0.007% | 0.87   |
| <i>OR2T4</i>    | p.PheTyrVal135LeuTyrLeu | Nonsynonymous                |                 | 0.37   |
| <i>OR4C3</i>    | p.ThrLeuPro289IleLeuSer | Nonsynonymous                |                 | 0.49   |
| <i>OR4C3</i>    | p.ValHis284MetLeu       | Nonsynonymous                |                 | 0.49   |
| <i>OR56A3</i>   | p.Gly314Glu             | Nonsynonymous                | 0.013% ± 0.012% | 0.29   |
| <i>OR6B1</i>    | p.Met256Leu             | Nonsynonymous                | 0.015% ± 0.012% | 0.25   |
| <i>OR8B8</i>    | p.Asn42Lys              | Nonsynonymous                | 0.105% ± 0.027% | 1.00   |
| <i>OR8U1</i>    | p.Phe200Leu             | Nonsynonymous                |                 | 0.12   |
| <i>PABPC3</i>   | p.Met326GlyfsTer21      | Deletion<br>(frameshift)     |                 | 28.00  |

|                  |                                             |                             |                 |       |
|------------------|---------------------------------------------|-----------------------------|-----------------|-------|
| <i>PABPC3</i>    | p.Phe335LeufsTer19                          | Deletion<br>(frameshift)    |                 | 28.00 |
| <i>PABPC3</i>    | p.Thr319Ile                                 | Nonsynonymous               | 0% ± 0.006%     | 28.00 |
| <i>PCDHA8</i>    | p.Ser150Tyr                                 | Nonsynonymous               | 0.041% ± 0.019% | 1.00  |
| <i>PEX6</i>      | p.Glu592Lys                                 | Nonsynonymous               | 0.044% ± 0.023% | 31.00 |
| <i>PHTF1</i>     | p.Gln237Lys                                 | Nonsynonymous               | 1.116% ± 0.081% | 11.00 |
| <i>PKD1</i>      | c.11388C>G(p.%3D)                           | Cryptic splicing            | 0.026% ± 0.016% | 32.00 |
| <i>PLCB2</i>     | p.Glu435Lys                                 | Nonsynonymous               | 0.191% ± 0.036% | 16.00 |
| <i>PLXDC1</i>    | p.Arg282Cys                                 | Nonsynonymous               | 0.101% ± 0.027% | 21.00 |
| <i>PPRC1</i>     | p.Leu1228Ile                                | Nonsynonymous               | 0.117% ± 0.029% | 24.00 |
| <i>PRPF39</i>    | p.Asn399Ser                                 | Nonsynonymous               | 0.247% ± 0.04%  | 25.00 |
| <i>PRSS3</i>     | p.Met166Leu                                 | Nonsynonymous               | 0.01% ± 0.012%  | 3.00  |
| <i>PYGM</i>      | p.Val624Ile                                 | Nonsynonymous               | 0.078% ± 0.024% | 50.00 |
| <i>QRICH2</i>    | p.Arg1403Cys                                | Cryptic splicing            | 0.238% ± 0.04%  | 9.00  |
| <i>RAMP3</i>     | p.Asp116Glu                                 | Nonsynonymous               | 0.049% ± 0.02%  | 48.00 |
| <i>RC3H1</i>     | p.Val146Ala                                 | Nonsynonymous               | 0.482% ± 0.055% | 16.00 |
| <i>RECQL5</i>    | c.2806-2A>G                                 | Splicing                    | 0.1% ± 0.038%   | 13.00 |
| <i>RFWD2</i>     | p.Ser477Ile                                 | Nonsynonymous               | 0.024% ± 0.014% | 24.00 |
| <i>ROBO1</i>     | c.4283-<br>6_4284delCCTTAGGCinsTC<br>TTAGGT | exonic_splicing             |                 | 15.00 |
| <i>RPL3L</i>     | p.Asp149Asn                                 | Nonsynonymous               | 0.028% ± 0.016% | 62.00 |
| <i>RRP8</i>      | p.Glu9Ter                                   | Stopgain                    | 0.027% ± 0.027% | 16.00 |
| <i>SBF2</i>      | p.Lys1672del                                | Deletion<br>(nonframeshift) | 0.061% ± 0.021% | 20.00 |
| <i>SEPP1</i>     | p.Arg368Cys                                 | Nonsynonymous               | 0.432% ± 0.052% | 46.00 |
| <i>SEPP1</i>     | p.Met263Ile                                 | Nonsynonymous               | 0.434% ± 0.052% | 46.00 |
| <i>SIGIRR</i>    | p.Ala236Gly                                 | Nonsynonymous               | 0.264% ± 0.066% | 27.00 |
| <i>SLC12A2</i>   | p.Ala99_Ala101del                           | Deletion<br>(nonframeshift) |                 | 12.00 |
| <i>SLC22A8</i>   | p.Ala310Val                                 | Cryptic splicing            | 0.064% ± 0.022% | 0.47  |
| <i>SLC25A32</i>  | p.Ala39Ser                                  | Nonsynonymous               | 0.021% ± 0.015% | 22.00 |
| <i>SLC30A9</i>   | p.Met50Val                                  | Nonsynonymous               |                 | 43.00 |
| <i>SLC5A1</i>    | p.Ile34Thr                                  | Nonsynonymous               | 0.027% ± 0.016% | 55.00 |
| <i>SLCO1B1</i>   | p.Arg57Gln                                  | Nonsynonymous               | 0.037% ± 0.018% | 0.39  |
| <i>SLIT1</i>     | p.Asn700Lys                                 | Nonsynonymous               | 0.144% ± 0.031% | 0.41  |
| <i>SMTNL2</i>    | p.Glu461Lys                                 | Nonsynonymous               | 0.57% ± 0.059%  | 23.00 |
| <i>SORBS3</i>    | p.Ile556Thr                                 | Nonsynonymous               |                 | 45.00 |
| <i>SPACA3</i>    | p.His100Arg                                 | Cryptic splicing            | 0.123% ± 0.029% | 0.55  |
| <i>SPATA31E1</i> | p.Met65Arg                                  | Nonsynonymous               | 0.375% ± 0.055% | 0.31  |
| <i>SRRM3</i>     | c.566C>T(p.%3D)                             | Cryptic splicing            | 1.364% ± 0.271% | 16.00 |
| <i>TACC3</i>     | p.Gln4Arg                                   | Nonsynonymous               | 0.122% ± 0.029% | 15.00 |
| <i>TAS2R1</i>    | p.Ala193Asp                                 | Nonsynonymous               | 0.024% ± 0.014% | 0.39  |
| <i>TICRR</i>     | p.Gln1399Glu                                | Nonsynonymous               | 0.107% ± 0.027% | 3.00  |
| <i>TMC3</i>      | c.1273-7_1273-6dupTC                        | Splice region               |                 | 2.00  |
| <i>TMEM175</i>   | p.Pro14Leu                                  | Nonsynonymous               | 0.256% ± 0.042% | 29.00 |
| <i>TRBV11-2</i>  |                                             | Cryptic splicing            |                 | 1.00  |
| <i>TRIOBP</i>    | p.Ala322Val                                 | Cryptic splicing            | 0.069% ± 0.023% | 29.00 |
| <i>TSPYL2</i>    | p.Ile472Val                                 | Cryptic splicing            | 0.067% ± 0.022% | 65.00 |

|                     |                           |                          |                 |       |
|---------------------|---------------------------|--------------------------|-----------------|-------|
| <i>TTN</i>          | p.Lys22368Asn             | Nonsynonymous            | 0.007% ± 0.01%  | 72.00 |
| <i>TVP23C-CDRT4</i> | p.SerValPheTrp199ThrValPh | Nonsynonymous            |                 |       |
| <i>TVP23C</i>       | eArg                      |                          |                 |       |
| <i>UBAP2</i>        | p.Phe869Cys               | Nonsynonymous            | 0.024% ± 0.014% | 16.00 |
| <i>USP36</i>        | p.Val271Ile               | Nonsynonymous            |                 | 21.00 |
| <i>UTRN</i>         | p.Ile2227Val              | Cryptic splicing         | 0.391% ± 0.05%  | 21.00 |
| <i>WBSCR27</i>      | c.389-3_389-2dupCA        | Splicing                 |                 | 6.00  |
| <i>ZBTB10</i>       | p.Gly850Ala               | Nonsynonymous            | 0.031% ± 0.018% | 15.00 |
| <i>ZDHHC19</i>      | p.ThrProGly305SerProArg   | Cryptic splicing         |                 | 4.00  |
| <i>ZNF438</i>       | p.Ala187LeufsTer6         | Deletion<br>(frameshift) |                 | 21.00 |
| <i>ZP3</i>          | p.Ser315Pro               | Nonsynonymous            |                 | 9.00  |
| <i>ZSCAN10</i>      | p.Arg69Pro                | Nonsynonymous            | 0.2% ± 0.112%   | 0.74  |

**Online Table III**  
**Prediction of Pathogenicity of the Variants**

|                  | <i>MYL2</i> :<br>p.Ala13Thr | <i>TTN</i> :<br>p.Lys22368Asn | <i>ALPK3</i> :<br>p.Thr81Met |
|------------------|-----------------------------|-------------------------------|------------------------------|
| PolyPhen2_HVAR   | B                           | D                             | B                            |
| SIFT             | T                           | D                             | D                            |
| LRT              | D                           | Unknown                       | Unknown                      |
| MutationTaster   | D                           | D                             | N                            |
| MutationAssessor | L                           | M                             | N                            |
| ClinVar          | P                           | Unknown                       | Unknown                      |
| CADD_phred       | 16.11                       | 10.46                         | 13.54                        |

PolyPhen2\_HVAR: Polymorphism Phenotyping v2 by Harvard, B: benign; D: Probably damaging

SIFT: Sorting Intolerant from Tolerant, D: Deleterious; T: tolerated

LRT: Likelihood Ratio Test, D: deleterious; N: neutral

MutationTaster, D: disease\_causing; N: polymorphism

MutationAssessor, M: predicted functional; L, N: predicted non-functional

ClinVar, P: pathogenic

CADD\_phred: Combined Annotation Dependent Depletion phred score
